# Supplementary material for: Pharmacological Evaluation of Cannabinoid Receptor Modulators Using GRABeCB2.0 Sensor
Source: MDPI journal article supplement (doi:10.3390/ijms25095012), 2024-05-03
Supplement: s1 [file s1]

# **Pharmacological Evaluation of Cannabinoid Receptor Modulators Using GRAB<sub>eCB2.0</sub> Sensor**

Samay Shivshankar,<sup>1</sup> Josephine Nimely,<sup>1</sup> Henry Puhl III<sup>2</sup> and Malliga R. Iyer<sup>1</sup>

<sup>1</sup>Section on Medicinal Chemistry, National Institute on Alcohol Abuse and Alcoholism, National Institutes of Health, 5625 Fishers Lane, Rockville, MD 20852, USA.

<sup>2</sup>Laboratory of Biophotonics and Quantum Biology, National Institute on Alcohol Abuse and Alcoholism, National Institutes of Health, 5625 Fishers Lane, Rockville, MD 20852, USA.

Correspondence: [malliga.iyer@nih.gov](mailto:malliga.iyer@nih.gov)

ORCID: 0000-0002-0116-4619

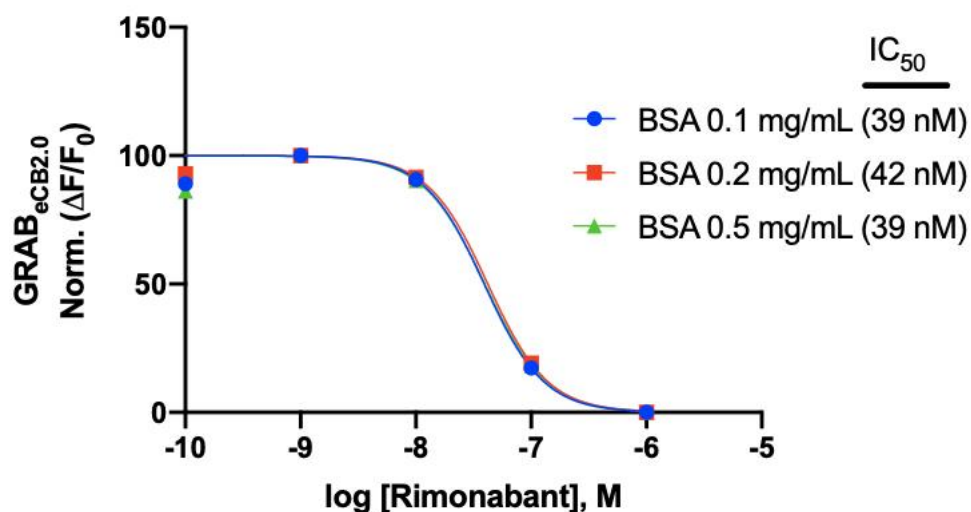

**Figure 1.** Rimonabant antagonist curve with 300 nM CP55940 as an agonist on the eCB2.0 sensor as normalized. The concentration curve runs from  $10^{-10}$  to  $10^{-6}$  at varied BSA concentrations (0.1-0.5 mg/mL) of final volume. Curves were fitted to a nonlinear regression model with 4 parameter, variable slope.  $\text{IC}_{50}$  values were calculated by GraphPad Prism 9. Data represent mean of minimum three independent experiments.

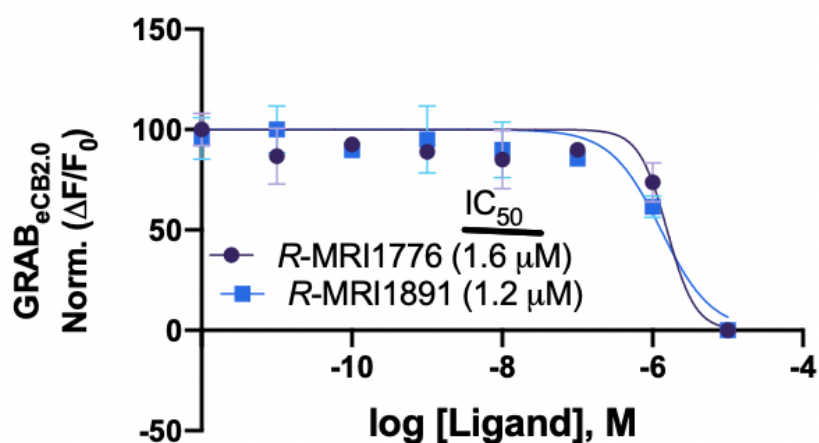

**Figure 2. A.** Antagonist potency of *R*-MRI-1776 and *R*-MRI-1891 at inhibiting GRAB<sub>eCB2.0</sub> fluorescence in presence of 300 nM of CP55940 as determined by averaging  $\Delta F/F_0$  normalized between 4-5 min. Curves were fitted to a nonlinear regression model with 4 parameter, variable slope. IC<sub>50</sub> values were calculated by GraphPad Prism 9. Data represent mean of minimum three independent experiments.

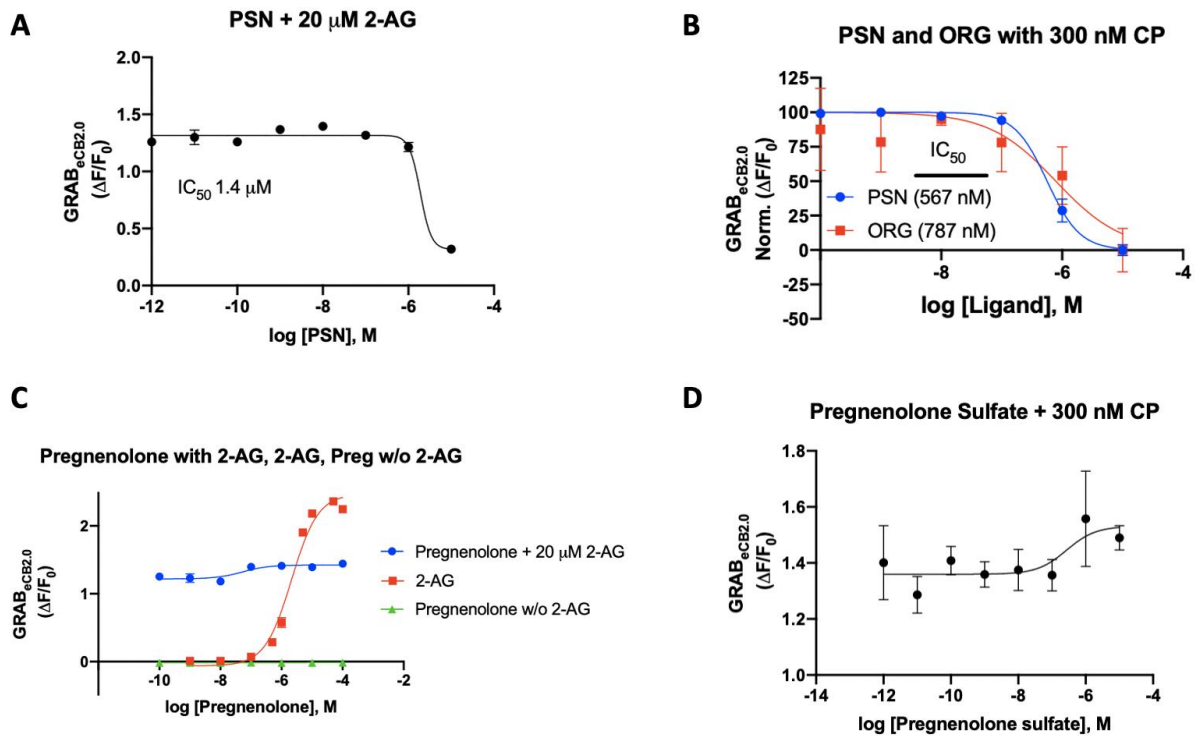

**Figure 3.** **A.** Fluorescent signal of PSN in the presence of 20  $\mu$ M 2-AG at inhibiting GRAB<sub>eCB2.0</sub> fluorescence as determined by averaging  $\Delta F/F_0$  between 4-5 min. **B.** Fluorescent signal of PSN and ORG in the presence of 300 nM CP55940 at inhibiting GRAB<sub>eCB2.0</sub> fluorescence as determined by averaging  $\Delta F/F_0$  and normalizing between 4-5 min. **C.** Fluorescent signal of Pregnenolone in the presence and absence of 20  $\mu$ M 2-AG at inhibiting GRAB<sub>eCB2.0</sub> fluorescence as determined by averaging  $\Delta F/F_0$  between 4-5 min. **D.** Fluorescent signal of Pregnenolone sulfate in the presence of 300 nM CP55940 at inhibiting GRAB<sub>eCB2.0</sub> fluorescence as determined by averaging  $\Delta F/F_0$  between 4-5 min. Curves were fitted to a nonlinear regression model with 3-parameter, variable by GraphPad Prism 9. Data represent mean of three independent experiments.

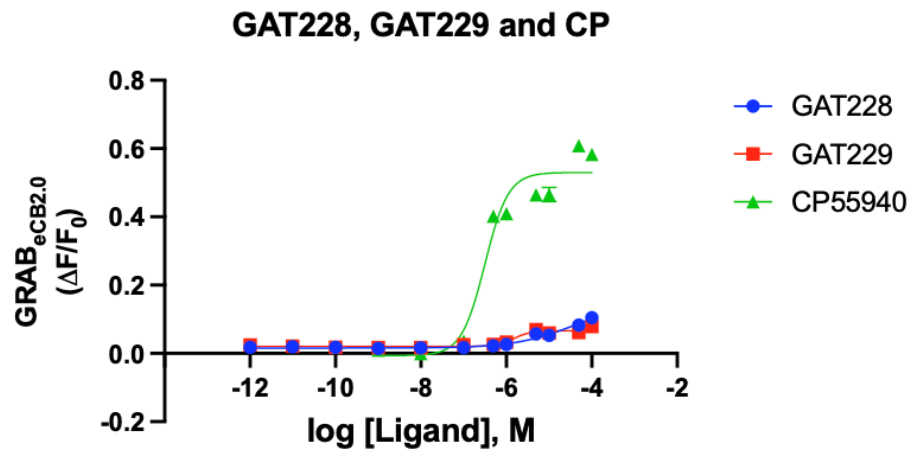

**Figure 4.** Concentration dependent responses of GAT228 and GAT229, and CP55940 at inducing GRAB<sub>eCB2.0</sub> fluorescent signal in the presence of 0.5 mg/mL BSA as determined by averaging  $\Delta F/F_0$  between 4-5 min. Data represent mean from minimum three independent experiments.

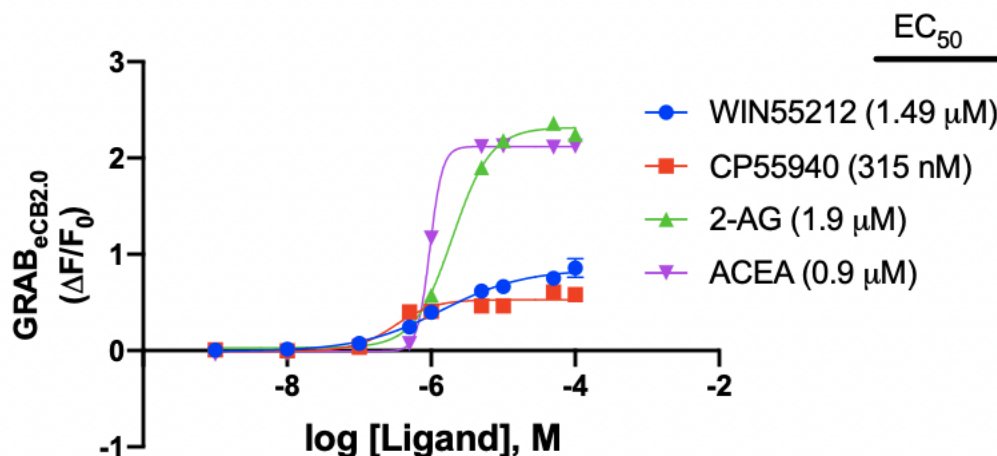

**Figure 5.** Concentration dependent responses and  $EC_{50}$  of 2-AG, ACEA, CP55940, and WIN55212-2, at inducing  $GRAB_{eCB2.0}$  fluorescent signal in the presence of 0.5 mg/mL BSA as determined by averaging  $\Delta F/F_0$  between 4-5 min.  $EC_{50}$  values were calculated by GraphPad Prism 9. Data represent mean from minimum three independent experiments.

Table 1.

| Structure                                                                                                                                                                                                           | $GRAB_{eCB2.0}^{* \&}$<br>$EC_{50}$ [nM]                      | CB1R<br>wild-type<br>binding <sup>#</sup><br>$K_i$ [nM] |
|---------------------------------------------------------------------------------------------------------------------------------------------------------------------------------------------------------------------|---------------------------------------------------------------|---------------------------------------------------------|
| <p>2-((1<i>R</i>,2<i>R</i>,5<i>R</i>)-5-hydroxy-2-(3-hydroxypropyl)cyclohexyl)-5-(2-methyloctan-2-yl)phenol</p> 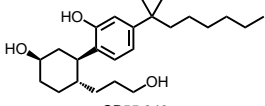 <p>CP55,940</p> | <p><math>64 \pm 8^*</math><br/>(315)<sup>&amp;</sup></p>      | 0.6-5                                                   |
| <p>1,3-dihydroxypropan-2-yl (5<i>Z</i>,8<i>Z</i>,11<i>Z</i>,14<i>Z</i>)-<br/>icosa-5,8,11,14-tetraenoate</p>  <p>2-AG</p>        | <p><math>2000 \pm 296^*</math><br/>(1900)<sup>&amp;</sup></p> | 25-472                                                  |
| <p>(5<i>Z</i>,8<i>Z</i>,11<i>Z</i>,14<i>Z</i>)-<i>N</i>-(2-chloroethyl)icosa-5,8,11,14-tetraenamide</p>  <p>ACEA</p>             | <p><math>572 \pm 4.1^*</math><br/>(900)<sup>&amp;</sup></p>   | 1.4                                                     |

|                                                                                                                                                                                                                               |                                                  |                   |
|-------------------------------------------------------------------------------------------------------------------------------------------------------------------------------------------------------------------------------|--------------------------------------------------|-------------------|
| 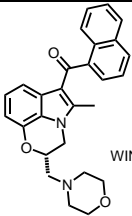 <p>WIN 55,212-2</p> <p>(S)-(5-methyl-2-(morpholinomethyl)-2,3-dihydro-[1,4]oxazino[2,3,4-<i>h</i>]indol-6-yl)(naphthalen-1-yl)methanone</p> | $564 \pm 34^*$<br>(1490) <sup>&amp;</sup>        | 62.3              |
|  <p>MRI-2594</p> <p>(Z)-2-(4,5-dimethyl-2-((2,2,3,3-tetramethylcyclopropane-1-carbonyl)imino)thiazol-3(2H)-yl)ethyl acetate</p>              | $527 \pm 27^*$<br>(25 ± 27.5) <sup>&amp;</sup>   | 1                 |
|  <p>MRI-2687</p> <p>2-(6-methyl-2-((2,2,3,3-tetramethylcyclopropane-1-carbonyl)imino)benzo[d]thiazol-3(2H)-yl)ethyl acetate</p>              | $1300 \pm 182^*$<br>(25 ± 27.5) <sup>&amp;</sup> | - <sup>1</sup>    |
|  <p>Rimonabant</p> <p>1-(4-chlorophenyl)-2-(4-chlorophenyl)-5-(4-chlorophenyl)-1H-1,2,4-triazole-3-carboxamide</p>                          | $25 \pm 2.5^{\&}$                                | 5.6 <sup>2</sup>  |
|  <p>Taranabant</p> <p>1-(4-cyano-2-(4-chlorophenyl)ethyl)-2-(4-chlorophenyl)-5-(4-chlorophenyl)-1H-1,2,4-triazole-3-carboxamide</p>        | $23 \pm 5^{\&}$                                  | 0.13 <sup>3</sup> |
|  <p>Otenabant</p> <p>1-(4-chlorophenyl)-2-(4-chlorophenyl)-5-(4-chlorophenyl)-1H-1,2,4-triazole-3-carboxamide</p>                          | $41 \pm 4.8^{\&}$                                | 0.7 <sup>4</sup>  |
|  <p>Ibipinabant (rac)</p> <p>1-(4-chlorophenyl)-2-(4-chlorophenyl)-5-(4-chlorophenyl)-1H-1,2,4-triazole-3-carboxamide</p>                  | $214 \pm 36^{\&}$                                | 7.8 <sup>5</sup>  |
|  <p>JD5037</p> <p>1-(4-chlorophenyl)-2-(4-chlorophenyl)-5-(4-chlorophenyl)-1H-1,2,4-triazole-3-carboxamide</p>                             | $29 \pm 3.5^{\&}$                                | 0.5 <sup>6</sup>  |

|                                                                                                                                                                                                                                                                                                   |                    |               |
|---------------------------------------------------------------------------------------------------------------------------------------------------------------------------------------------------------------------------------------------------------------------------------------------------|--------------------|---------------|
| <p><i>N</i>-(<i>N</i>-((<i>S</i>)-3-(4-chlorophenyl)-4-phenyl-4,5-dihydro-1<i>H</i>-pyrazol-1-yl))<br/>(((4-(trifluoromethyl)phenyl)sulfonyl)imino)methyl)carbamidoyl)acetamide</p> 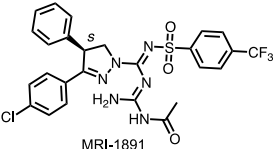 <p>MRI-1891</p>             | $9.8 \pm 1.4^{\&}$ | $0.3^7$       |
| <p>(<i>S</i>)-<i>N</i>-((<i>Z</i>)-1-aminoethylidene)-3-(4-chlorophenyl)-4-phenyl-<i>N</i>'-(4-(trifluoromethyl)phenyl)sulfonyl)-4,5-dihydro-1<i>H</i>-pyrazole-1-carboximidamide</p>  <p>MRI-1867</p>           | $90 \pm 5.4^{\&}$  | $2.3^{8,9}$   |
| <p><i>N</i>-(<i>N</i>'-(((<i>S</i>)-3-(4-chlorophenyl)-4-phenyl-4,5-dihydro-1<i>H</i>-pyrazol-1-yl))((4-chlorophenyl)sulfonyl)imino)methyl)carbamidoyl)acetamide</p>  <p>MRI-1776</p>                            | $13 \pm 1.8^{\&}$  | $0.81^{10}$   |
| MRI1887                                                                                                                                                                                                                                                                                           | $95 \pm 6.5^{\&}$  | $0.85^{10}$   |
| MRI2006                                                                                                                                                                                                                                                                                           | $36 \pm 3.1^{\&}$  | $0.5^{10}$    |
| <p>(<i>S</i>)-<i>N</i>-1-aminoethylidene)-3-(4-chlorophenyl)-<i>N</i>-(<i>N,N</i>-diethylsulfonyl)-4-phenyl-4,5-dihydro-1<i>H</i>-pyrazole-1-carboximidamide</p>  <p>MRI-2213</p>                              | $69 \pm 1.2^{\&}$  | $1.2^{11}$    |
| <p><i>N</i>-(<i>N</i>'-((<i>R</i>)-3-(4-chlorophenyl)-4-phenyl-4,5-dihydro-1<i>H</i>-pyrazol-1-yl))<br/>(((4-(trifluoromethyl)phenyl)sulfonyl)imino)methyl)carbamidoyl)acetamide</p>  <p><i>R</i>-MRI-1891</p> | $1600^{\&}$        | N.A           |
| <p><i>N</i>-(<i>N</i>'-(((<i>R</i>)-3-(4-chlorophenyl)-4-phenyl-4,5-dihydro-1<i>H</i>-pyrazol-1-yl))((4-chlorophenyl)sulfonyl)imino)methyl)carbamidoyl)acetamide</p>  <p><i>R</i>-MRI-1776</p>                 | $1200^{\&}$        | $105^{10}$    |
|  <p>ORG27569</p>                                                                                                                                                                                               | $787^{\&}$         | $217^{12}$    |
|  <p>PSNCBAM-1</p>                                                                                                                                                                                              | $567^{\&}$         | $45-230^{13}$ |

|                                                                                                           |   |                   |
|-----------------------------------------------------------------------------------------------------------|---|-------------------|
| 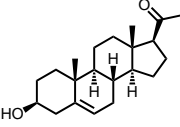<br>Pregnenolone         | - | -                 |
| <br>Pregnenolone sulfate | - | -                 |
| <br>GAT228               | & | -                 |
| <br>GAT229               | & | 358 <sup>14</sup> |

\*Values ligand binding experiments carried out without BSA in the buffer. Of note, the agonists performed better on the eCB2.0 sensor in the absence of BSA in buffer.

&Values ligand binding experiments carried out without BSA in the buffer. Of note, the antagonists performed better on the eCB2.0 sensor in the presence of 0.5 mg/mL BSA in buffer.

#Literature reported values where available.

N.A not available



## Bibliography

- (1) Li, X.; Hua, T.; Vemuri, K.; Ho, J.-H.; Wu, Y.; Wu, L.; Popov, P.; Benchama, O.; Zvonok, N.; Locke, K.; Qu, L.; Han, G. W.; Iyer, M. R.; Cinar, R.; Coffey, N. J.; Wang, J.; Wu, M.; Katritch, V.; Zhao, S.; Kunos, G.; Bohn, L. M.; Makriyannis, A.; Stevens, R. C.; Liu, Z.-J. Crystal Structure of the Human Cannabinoid Receptor CB2. *Cell* **2019**, *176*, 459–467.e13.
- (2) Rinaldi-Carmona, M.; Pialot, F.; Congy, C.; Redon, E.; Barth, F.; Bachy, A.; Brelière, J. C.; Soubrié, P.; Le Fur, G. Characterization and Distribution of Binding Sites for [3H]-SR 141716A, a Selective Brain (CB1) Cannabinoid Receptor Antagonist, in Rodent Brain. *Life Sci.* **1996**, *58*, 1239–1247.
- (3) Lin, L. S.; Lanza, T. J.; Jewell, J. P.; Liu, P.; Shah, S. K.; Qi, H.; Tong, X.; Wang, J.; Xu, S. S.; Fong, T. M.; Shen, C.-P.; Lao, J.; Xiao, J. C.; Shearman, L. P.; Stribling, D. S.; Rosko, K.; Strack, A.; Marsh, D. J.; Feng, Y.; Kumar, S.; Samuel, K.; Yin, W.; Van der Ploeg, L. H. T.; Goulet, M. T.; Hagmann, W. K. Discovery of N-[(1S,2S)-3-(4-Chlorophenyl)-2-(3-Cyanophenyl)-1-Methylpropyl]-2-Methyl-2-[(5-(Trifluoromethyl)Pyridin-2-Yl)Oxy]propanamide (MK-0364), a Novel, Acyclic Cannabinoid-1 Receptor Inverse Agonist for the Treatment of Obesity. *J. Med. Chem.* **2006**, *49*, 7584–7587.
- (4) Griffith, D. A.; Hadcock, J. R.; Black, S. C.; Iredale, P. A.; Carpino, P. A.; DaSilva-Jardine, P.; Day, R.; DiBrino, J.; Dow, R. L.; Landis, M. S.; O'Connor, R. E.; Scott, D. O. Discovery of 1-[9-(4-Chlorophenyl)-8-(2-Chlorophenyl)-9H-Purin-6-Yl]-4-Ethylaminopiperidine-4-Carboxylic Acid Amide Hydrochloride (CP-945,598), a Novel, Potent, and Selective Cannabinoid Type 1 Receptor Antagonist. *J. Med. Chem.* **2009**, *52*, 234–237.
- (5) Lange, J. H. M.; Coolen, H. K. A. C.; van Stuivenberg, H. H.; Dijkman, J. A. R.; Herremans, A. H. J.; Ronken, E.; Keizer, H. G.; Tipker, K.; McCreary, A. C.; Veerman, W.; Wals, H. C.; Stork, B.; Verveer, P. C.; den Hartog, A. P.; de Jong, N. M. J.; Adolfs, T. J. P.; Hoogendoorn, J.; Kruse, C. G. Synthesis, Biological Properties, and Molecular Modeling Investigations of Novel 3,4-Diarylpyrazolines as Potent and Selective CB(1) Cannabinoid Receptor Antagonists. *J. Med. Chem.* **2004**, *47*, 627–643.
- (6) Chorvat, R. J.; Berbaum, J.; Seriacki, K.; McElroy, J. F. JD-5006 and JD-5037: Peripherally Restricted (PR) Cannabinoid-1 Receptor Blockers Related to SLV-319 (Ibipinabant) as Metabolic Disorder Therapeutics Devoid of CNS Liabilities. *Bioorg. Med. Chem. Lett.* **2012**, *22*, 6173–6180.
- (7) Liu, Z.; Iyer, M. R.; Godlewski, G.; Jourdan, T.; Liu, J.; Coffey, N. J.; Zawatsky, C. N.; Puhl, H. L.; Wess, J.; Meister, J.; Liow, J.-S.; Innis, R. B.; Hassan, S. A.; Lee, Y. S.; Kunos, G.; Cinar, R. Functional Selectivity of a Biased Cannabinoid-1 Receptor (CB1R) Antagonist. *ACS Pharmacol. Transl. Sci.* **2021**, *4*, 1175–1187.
- (8) Cinar, R.; Iyer, M. R.; Liu, Z.; Cao, Z.; Jourdan, T.; Erdelyi, K.; Godlewski, G.; Szanda,

- G.; Liu, J.; Park, J. K.; Mukhopadhyay, B.; Rosenberg, A. Z.; Liow, J.-S.; Lorenz, R. G.; Pacher, P.; Innis, R. B.; Kunos, G. Hybrid Inhibitor of Peripheral Cannabinoid-1 Receptors and Inducible Nitric Oxide Synthase Mitigates Liver Fibrosis. *JCI Insight* **2016**, *1*.
- (9) Iyer, M. R.; Cinar, R.; Coffey, N. J.; Kunos, G. Synthesis of <sup>13</sup>C<sub>6</sub>-Labeled, Dual-Target Inhibitor of Cannabinoid-1 Receptor (CB<sub>1</sub> R) and Inducible Nitric Oxide Synthase (iNOS). *J. Labelled Comp. Radiopharm.* **2018**.
- (10) Dvorácskó, S.; Herrerias, A.; Oliverio, A.; Bhattacharjee, P.; Pommerolle, L.; Liu, Z.; Feng, D.; Lee, Y.-S.; Hassan, S. A.; Godlewski, G.; Cinar, R.; Iyer, M. R. Cannabinoforms: Designing Biguanide-Embedded, Orally Available, Peripherally Selective Cannabinoid-1 Receptor Antagonists for Metabolic Syndrome Disorders. *J. Med. Chem.* **2023**, *66*, 11985–12004.
- (11) Iyer, M. R.; Cinar, R.; Wood, C. M.; Zawatsky, C. N.; Coffey, N. J.; Kim, K. A.; Liu, Z.; Katz, A.; Abdalla, J.; Hassan, S. A.; Lee, Y.-S. Synthesis, Biological Evaluation, and Molecular Modeling Studies of 3,4-Diarylpirazoline Series of Compounds as Potent, Nonbrain Penetrant Antagonists of Cannabinoid-1 (CB<sub>1</sub>R) Receptor with Reduced Lipophilicity. *J. Med. Chem.* **2022**, *65*, 2374–2387.
- (12) Ahn, K. H.; Mahmoud, M. M.; Kendall, D. A. Allosteric Modulator ORG27569 Induces CB<sub>1</sub> Cannabinoid Receptor High Affinity Agonist Binding State, Receptor Internalization, and G<sub>i</sub> Protein-Independent ERK1/2 Kinase Activation. *J. Biol. Chem.* **2012**, *287*, 12070–12082.
- (13) Horswill, J. G.; Bali, U.; Shaaban, S.; Keily, J. F.; Jeevaratnam, P.; Babbs, A. J.; Reynet, C.; Wong Kai In, P. PSNCBAM-1, a Novel Allosteric Antagonist at Cannabinoid CB<sub>1</sub> Receptors with Hypophagic Effects in Rats. *Br. J. Pharmacol.* **2007**, *152*, 805–814.
- (14) Laprairie, R. B.; Kulkarni, P. M.; Deschamps, J. R.; Kelly, M. E. M.; Janero, D. R.; Cascio, M. G.; Stevenson, L. A.; Pertwee, R. G.; Kenakin, T. P.; Donovan-Wright, E. M.; Thakur, G. A. Enantiospecific Allosteric Modulation of Cannabinoid 1 Receptor. *ACS Chem. Neurosci.* **2017**, *8*, 1188–1203.
